# Supplementary material for: The role of cation and anion structural modifications for the enhanced CO2 solubility of hydroxyl ammonium- and pyridinium-based ionic liquids
Source: Royal Society of Chemistry journal article supplement (doi:10.1039/d6ra03083a), 2026-05-26
Supplement: d6ra03083a1.pdf [file d6ra03083a1.pdf]

## Electronic Supplementary Information

### The Role of Cation and Anion Structural Modifications for Enhanced CO<sub>2</sub> Solubility of hydroxyl ammonium and pyridinium-based Ionic Liquid

*Ahmed Mohamed Abdelmagid<sup>1\*</sup>, Abobakr Khidir Ziyada<sup>1,2</sup>, Abdalla Ahmed Elbashir<sup>3\*</sup>, Zakaria A. Salih<sup>4</sup>*

<sup>1</sup>Department Chemical Engineering and Chemical Technology, Faculty of Engineering and Technology, University of Gezira, Wad Medani, 21113, Sudan

<sup>2</sup> General Studies Department, Jubail Industrial College, Jubail Industrial City 31961, Saudi Arabia

<sup>3</sup>Department of Chemistry, College of Science, King Faisal University, P.O.Box 400, Al-Ahsa, 31982, Saudi Arabia.

<sup>4</sup>Research and Training Station, King Faisal University, P.O.Box 400, Al-Ahsa, 31982, Saudi Arabia.

\*All correspondence should be addressed to Ahmed Mohamed Abdelmagid and Abdalla Ahmed Elbashir

\* Authors whom all correspondence should be addressed.

Email: bahooti@gmail.com

E mail: aaeahmed@kfu.edu.sa

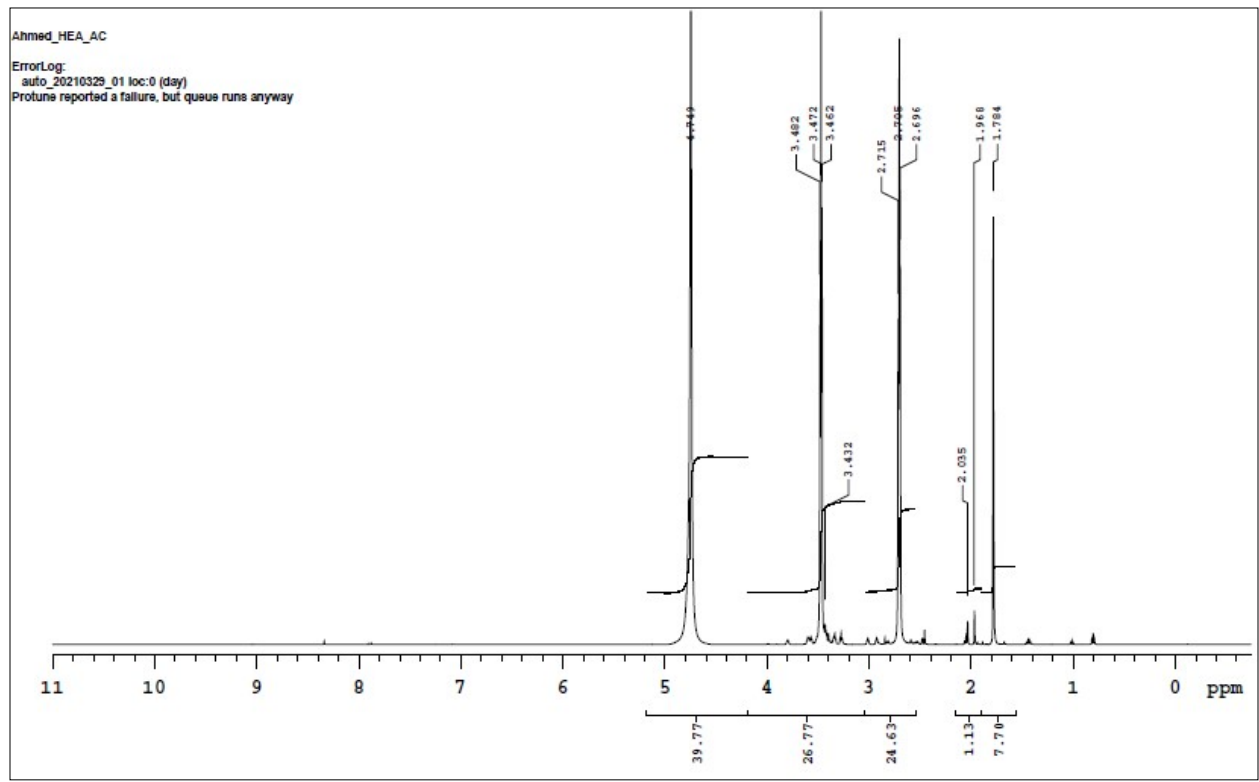

Figure S.1. <sup>1</sup>H NMR spectra for [HEA][Ac].

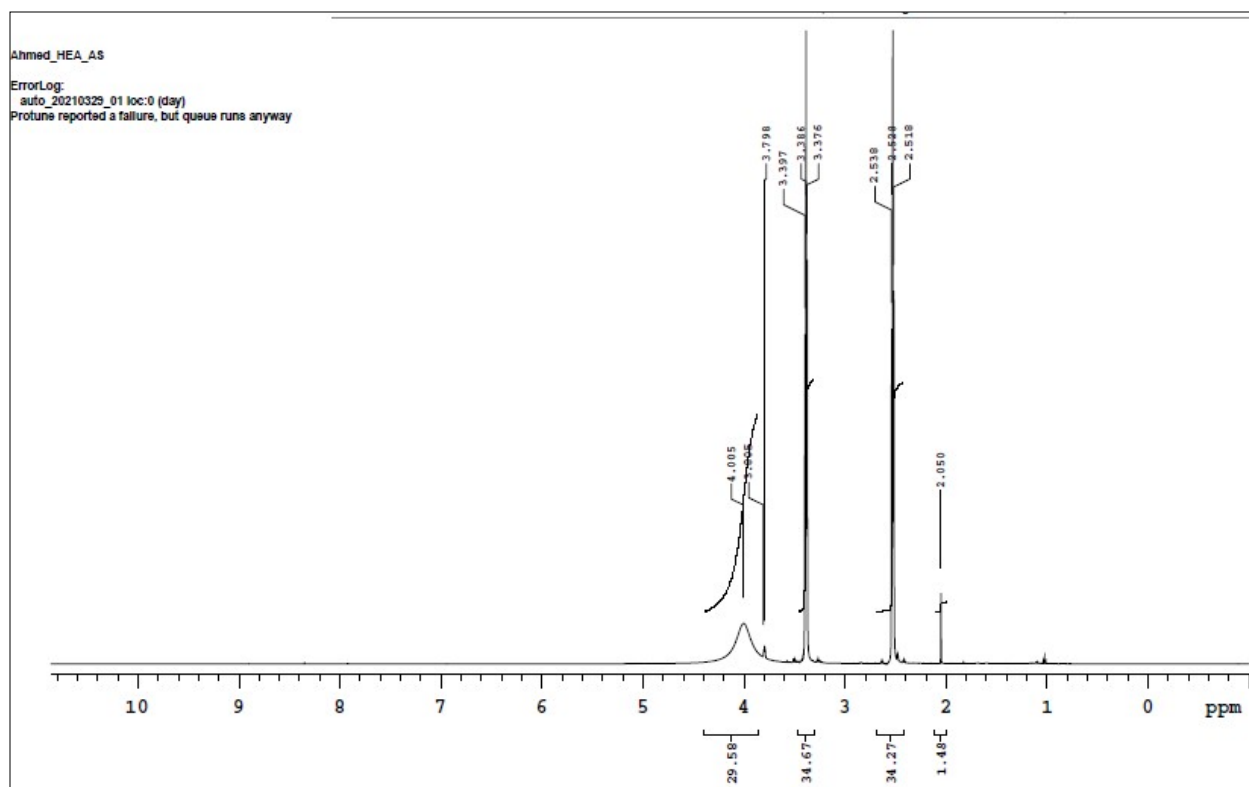

Figure S.2.  $^1\text{H}$  NMR spectra [HEA][As]

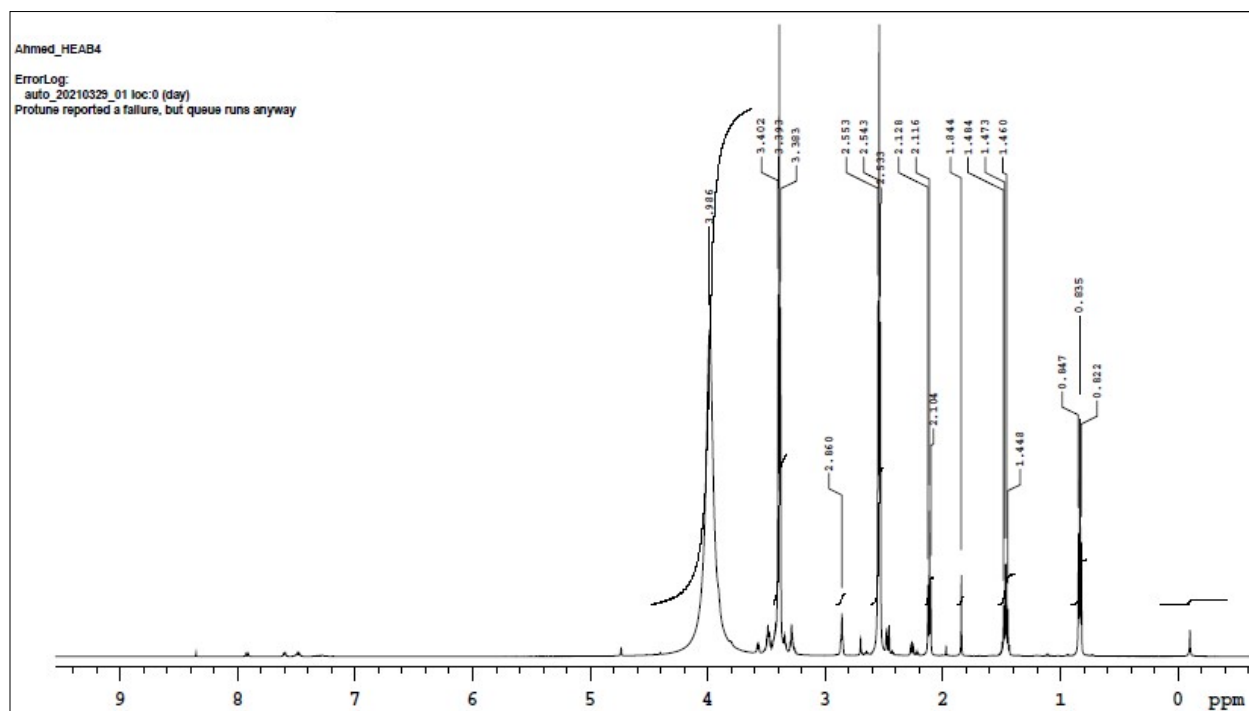

Figure S.3.  $^1\text{H}$  NMR spectra for [HEA][Bu].

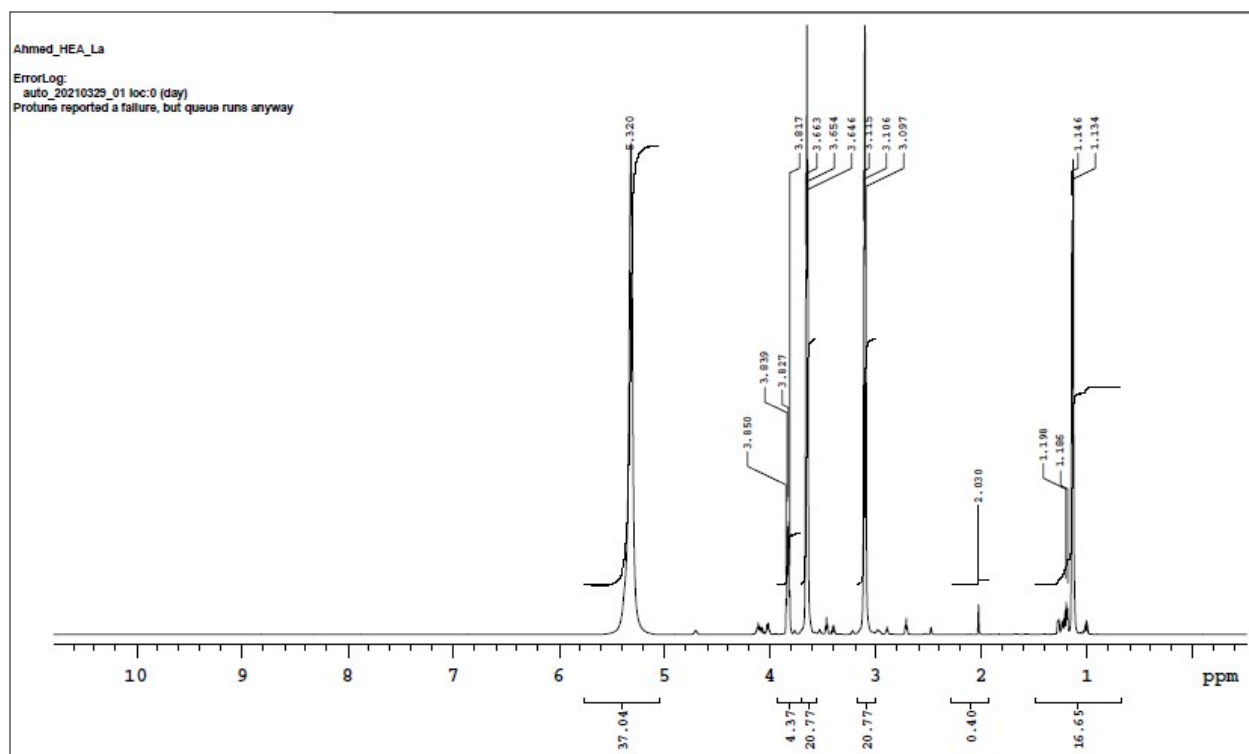

Figure S.4.  $^1\text{H}$  NMR spectra for [HEA][La].

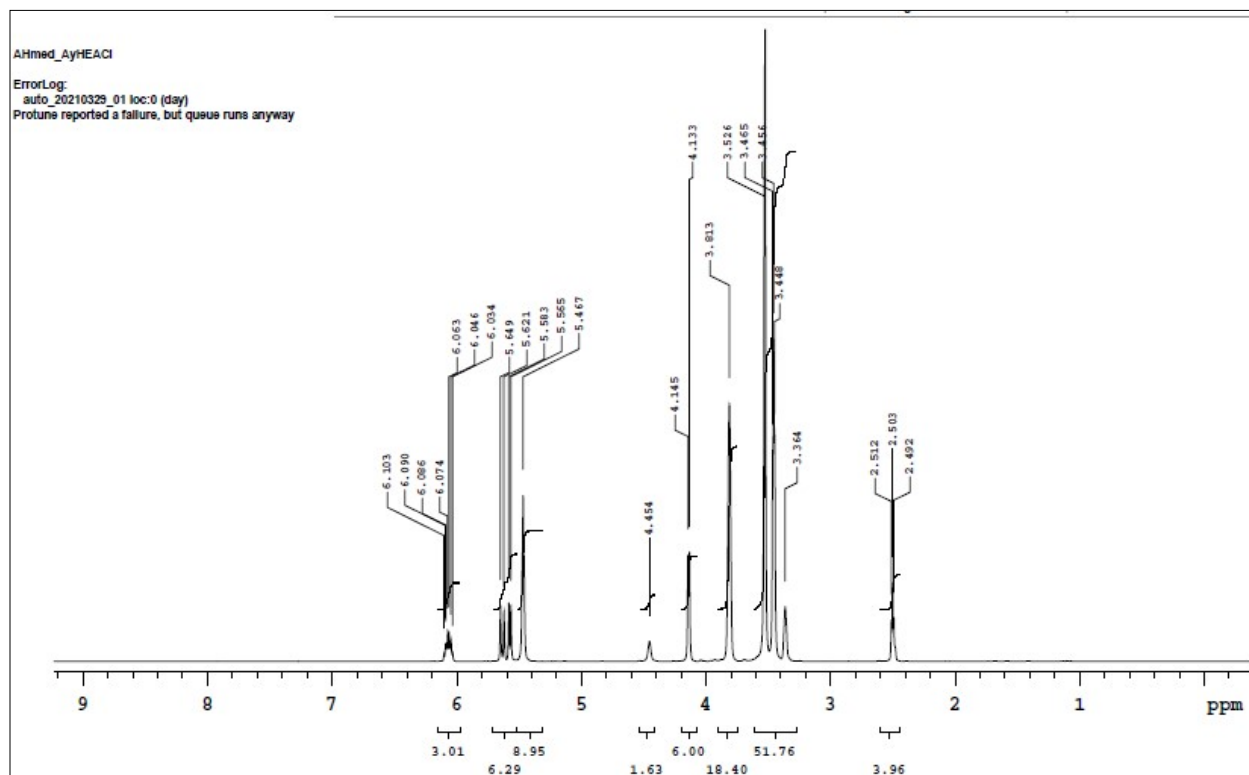

Figure S.5.  $^1\text{H}$  NMR spectra for [AyHEA][Cl].



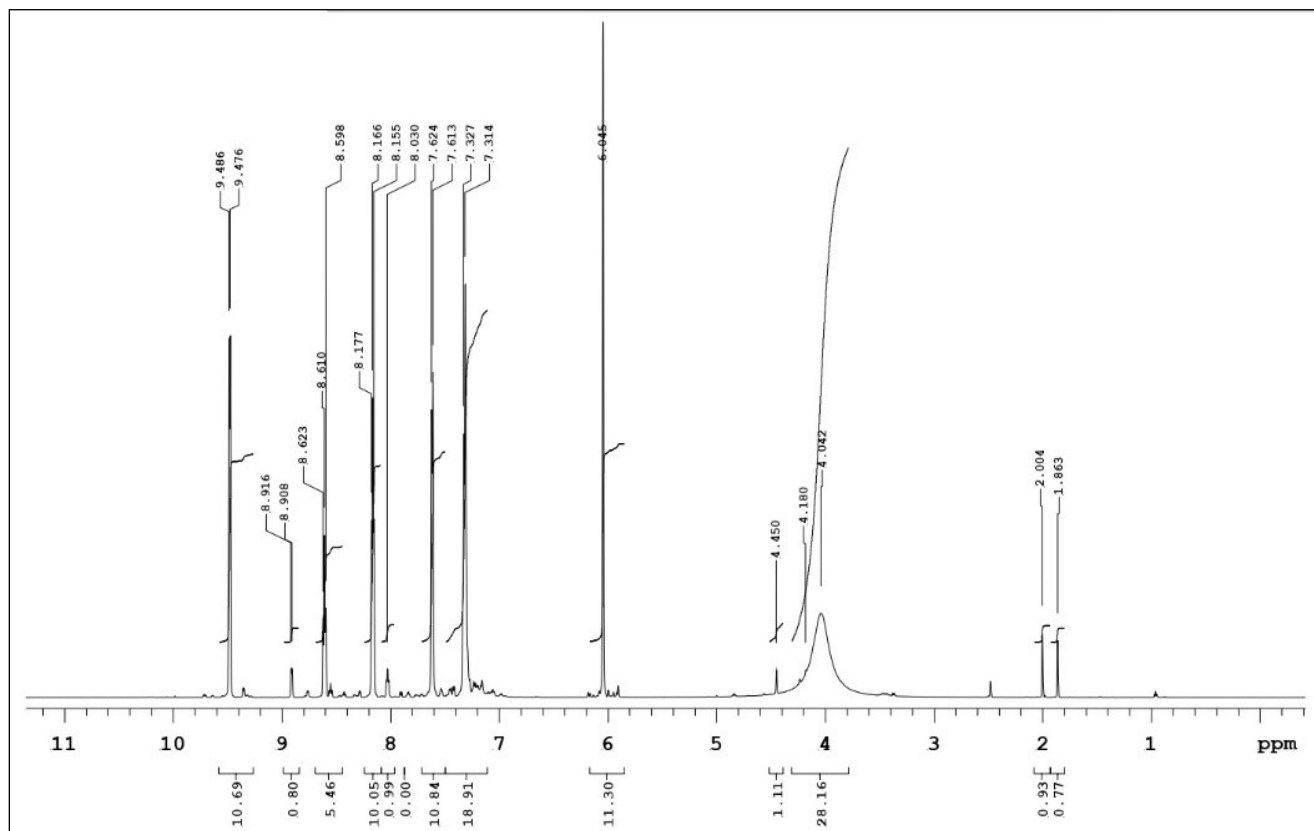

Fig S. 8. <sup>1</sup>H NMR spectra for [BzPy][Cl]

Table S. 1. Experimental solubility data for CO<sub>2</sub> in [HEA][As] at different pressures

| Time (min) | 20 bar $\chi$ | Time (min) | 15 bar $\chi$ | Time (min) | 10 bar $\chi$ | Time (min) | 5 bar $\chi$ | Time (min) | 1 bar $\chi$ |
|------------|---------------|------------|---------------|------------|---------------|------------|--------------|------------|--------------|
| 0          | 0             | 0          | 0             | 0          | 0             | 0          | 0            | 0          | 0            |
| 3.6        | 0.200         | 4.41       | 0.117         | 3.05       | 0.080         | 2.6        | 0.050        | 5.76       | 0.021        |
| 9          | 0.293         | 6.3        | 0.149         | 4.27       | 0.106         | 5.2        | 0.064        | 12.8       | 0.031        |
| 12.6       | 0.332         | 10.71      | 0.212         | 7.93       | 0.145         | 8.45       | 0.091        | 16.64      | 0.035        |
| 18         | 0.398         | 17.01      | 0.274         | 14.03      | 0.205         | 13.65      | 0.113        | 21.76      | 0.042        |
| 28.2       | 0.462         | 20.79      | 0.303         | 20.13      | 0.246         | 21.45      | 0.131        | 30.08      | 0.049        |
| 41.4       | 0.513         | 23.94      | 0.330         | 25.62      | 0.276         | 29.25      | 0.151        | 36.48      | 0.054        |
| 48         | 0.533         | 35.28      | 0.389         | 36.6       | 0.316         | 38.35      | 0.164        | 39.04      | 0.056        |
| 58.2       | 0.551         | 46.62      | 0.423         | 41.48      | 0.337         | 57.2       | 0.184        | 44.16      | 0.058        |
| 65.4       | 0.556         | 52.29      | 0.432         | 46.97      | 0.346         | 77.35      | 0.192        | 50.56      | 0.060        |
| 78         | 0.563         | 66.78      | 0.456         | 54.9       | 0.359         | 92.3       | 0.196        | 62.72      | 0.061        |
| 91.2       | 0.568         | 74.34      | 0.461         | 66.49      | 0.366         | 117        | 0.204        | 69.76      | 0.061        |
| 100.8      | 0.574         | 83.16      | 0.470         | 82.35      | 0.374         | 120.9      | 0.205        | 80.64      | 0.061        |
| 117.6      | 0.578         | 90.72      | 0.476         | 98.82      | 0.383         | 128.7      | 0.206        | 88.32      | 0.061        |
| 126.6      | 0.580         | 98.91      | 0.483         | 106.75     | 0.385         | 133.9      | 0.208        | 96         | 0.062        |
| 129        | 0.581         | 115.29     | 0.492         | 120.78     | 0.385         | 138.45     | 0.209        | 112        | 0.062        |
| 137.4      | 0.583         | 123.48     | 0.497         | 125.66     | 0.385         | 144.95     | 0.213        | 119.68     | 0.062        |
| 145.8      | 0.588         | 131.04     | 0.498         | 142.13     | 0.385         | 153.4      | 0.214        | 135.04     | 0.062        |
| 154.2      | 0.588         | 147.42     | 0.500         | 147.62     | 0.385         | 157.3      | 0.215        | 143.36     | 0.062        |
| 168.6      | 0.588         | 171.99     | 0.501         | --         | --            | 168.35     | 0.218        | 161.28     | 0.062        |

Table S. 2. Experimental solubility data for CO<sub>2</sub> in [HEA][La] at different pressures

| Time (min) | 20 bar $\chi$ | Time (min) | 15 bar $\chi$ | Time (min) | 10 bar $\chi$ | Time (min) | 5 bar $\chi$ | Time (min) | 1 bar $\chi$ |
|------------|---------------|------------|---------------|------------|---------------|------------|--------------|------------|--------------|
| 0          | 0             | 0          | 0             | 0          | 0             | 0          | 0            | 0          | 0            |
| 1.2        | 0.117         | 2.52       | 0.068         | 5          | 0.083         | 3.25       | 0.040        | 1.28       | 0.011        |
| 2.4        | 0.155         | 4.41       | 0.097         | 8          | 0.117         | 5.85       | 0.053        | 2.56       | 0.015        |
| 6.6        | 0.212         | 6.93       | 0.129         | 11         | 0.160         | 9.1        | 0.072        | 7.04       | 0.020        |
| 14.4       | 0.300         | 10.08      | 0.176         | 13         | 0.173         | 14.95      | 0.102        | 14.72      | 0.028        |
| 21         | 0.361         | 18.27      | 0.246         | 16         | 0.198         | 27.3       | 0.131        | 21.76      | 0.034        |
| 27         | 0.404         | 23.31      | 0.271         | 19         | 0.222         | 31.85      | 0.138        | 28.16      | 0.038        |
| 37.8       | 0.463         | 32.76      | 0.317         | 21.96      | 0.238         | 39         | 0.149        | 39.68      | 0.044        |
| 43.8       | 0.493         | 36.54      | 0.331         | 24.4       | 0.250         | 46.15      | 0.160        | 45.44      | 0.046        |
| 49.2       | 0.507         | 39.69      | 0.338         | 28.67      | 0.269         | 52         | 0.170        | 51.2       | 0.048        |
| 57.6       | 0.526         | 43.47      | 0.346         | 35.38      | 0.286         | 59.15      | 0.176        | 60.16      | 0.049        |
| 69         | 0.541         | 61.11      | 0.385         | 43.92      | 0.305         | 62.4       | 0.180        | 71.68      | 0.050        |
| 86.4       | 0.553         | 69.3       | 0.400         | 53.07      | 0.315         | 77.35      | 0.185        | 89.6       | 0.052        |
| 94.8       | 0.559         | 83.16      | 0.416         | 61.61      | 0.324         | 88.4       | 0.190        | 98.56      | 0.052        |
| 103.2      | 0.562         | 106.47     | 0.432         | 70.76      | 0.330         | 99.45      | 0.191        | 107.52     | 0.053        |
| 111.6      | 0.564         | 120.96     | 0.444         | 84.18      | 0.336         | 110.5      | 0.192        | 116.48     | 0.053        |
| 126        | 0.564         | 129.15     | 0.450         | 99.43      | 0.338         | 114.4      | 0.192        | 131.2      | 0.053        |
| 131.4      | 0.564         | 143.01     | 0.455         | 114.68     | 0.339         | 125.45     | 0.192        | 136.96     | 0.053        |
| 148.2      | 0.564         | 153.09     | 0.456         | 132.37     | 0.339         | 136.5      | 0.192        | 154.24     | 0.053        |
| 165        | 0.564         | 161        | 0.456         | --         | --            | 161.2      | 0.198        | 157.44     | 0.053        |

Table S. 3. Experimental solubility data for CO<sub>2</sub> in [HEA][Bu] at different pressures

| Time (min) | 20 bar $\chi$ | Time (min) | 15 bar $\chi$ | Time (min) | 10 bar $\chi$ | Time (min) | 5 bar $\chi$ | Time (min) | 1 bar $\chi$ |
|------------|---------------|------------|---------------|------------|---------------|------------|--------------|------------|--------------|
| 0          | 0             | 0          | 0             | 0          | 0             | 0          | 0            | 0          | 0            |
| 3.6        | 0.132         | 3.15       | 0.088         | 3.66       | 0.074         | 4.55       | 0.036        | 1.92       | 0.010        |
| 6          | 0.186         | 5.67       | 0.117         | 6.1        | 0.095         | 7.8        | 0.048        | 3.84       | 0.014        |
| 11.4       | 0.255         | 9.45       | 0.161         | 9.15       | 0.135         | 12.35      | 0.066        | 6.4        | 0.019        |
| 13.8       | 0.275         | 18.27      | 0.228         | 14.03      | 0.174         | 18.2       | 0.094        | 12.16      | 0.023        |
| 17.4       | 0.315         | 27.09      | 0.274         | 17.69      | 0.193         | 24.7       | 0.113        | 16         | 0.026        |
| 22.2       | 0.353         | 34.65      | 0.307         | 21.35      | 0.210         | 31.85      | 0.126        | 22.4       | 0.030        |
| 25.8       | 0.380         | 38.43      | 0.319         | 25.01      | 0.230         | 40.95      | 0.145        | 32         | 0.034        |
| 34.2       | 0.428         | 44.1       | 0.329         | 36.6       | 0.261         | 47.45      | 0.154        | 40.32      | 0.036        |
| 39.6       | 0.455         | 49.77      | 0.345         | 42.09      | 0.268         | 53.3       | 0.159        | 56.32      | 0.038        |
| 47.4       | 0.486         | 57.96      | 0.363         | 47.58      | 0.274         | 62.4       | 0.164        | 64.64      | 0.039        |
| 58.2       | 0.516         | 69.93      | 0.377         | 67.1       | 0.290         | 74.75      | 0.168        | 76.16      | 0.040        |
| 63.6       | 0.525         | 86.94      | 0.401         | 75.64      | 0.295         | 93.6       | 0.171        | 90.24      | 0.040        |
| 75.6       | 0.534         | 95.76      | 0.416         | 84.18      | 0.300         | 102.7      | 0.174        | 104.32     | 0.040        |
| 89.4       | 0.538         | 103.95     | 0.421         | 86.62      | 0.303         | 111.8      | 0.176        | 120.32     | 0.040        |
| 103.2      | 0.540         | 112.77     | 0.428         | 95.16      | 0.307         | 120.9      | 0.176        | 126.08     | 0.040        |
| 118.8      | 0.540         | 126.63     | 0.428         | 111.63     | 0.314         | 136.5      | 0.176        | 133.76     | 0.040        |
| 150.6      | 0.544         | 132.3      | 0.429         | 120.17     | 0.315         | 142.35     | 0.176        | 138.88     | 0.040        |
| 155.4      | 0.544         | 149.31     | 0.429         | 136.64     | 0.317         | 150.15     | 0.176        | 144        | 0.040        |
| 160.8      | 0.545         | 154        | 0.429         | --         | --            | 153.4      | 0.176        | 146.56     | 0.040        |

Table S.4. Experimental solubility data for CO<sub>2</sub> in [HEA][Ac] at different pressures

| Time (min) | 20 bar $\chi$ | Time (min) | 15 bar $\chi$ | Time (min) | 10 bar $\chi$ | Time (min) | 5 bar $\chi$ | Time (min) | 1 bar $\chi$ |
|------------|---------------|------------|---------------|------------|---------------|------------|--------------|------------|--------------|
| 0          | 0             | 0          | 0             | 0          | 0             | 0          | 0            | 0          | 0            |
| 4.2        | 0.109         | 4.41       | 0.081         | 4.27       | 0.025         | 3.25       | 0.020        | 1.92       | 0.003        |
| 7.2        | 0.164         | 12         | 0.175         | 10.37      | 0.085         | 10.4       | 0.056        | 5.12       | 0.008        |
| 9.6        | 0.213         | 19.53      | 0.235         | 14.64      | 0.118         | 16.9       | 0.081        | 10.24      | 0.012        |
| 18         | 0.297         | 28.98      | 0.264         | 18.3       | 0.143         | 24.05      | 0.099        | 27.52      | 0.018        |
| 24.6       | 0.328         | 40.95      | 0.282         | 28.06      | 0.180         | 31.85      | 0.112        | 39.04      | 0.021        |
| 33         | 0.357         | 51.03      | 0.291         | 37.21      | 0.207         | 50.7       | 0.126        | 53.76      | 0.023        |
| 42.6       | 0.379         | 56.07      | 0.296         | 43.92      | 0.216         | 55.25      | 0.129        | 65.28      | 0.024        |
| 51.6       | 0.392         | 64.89      | 0.306         | 55.51      | 0.226         | 68.25      | 0.132        | 71.04      | 0.025        |
| 61.8       | 0.395         | 68.67      | 0.310         | 67.1       | 0.233         | 70.2       | 0.134        | 76.16      | 0.025        |
| 72.6       | 0.398         | 74.97      | 0.317         | 71.98      | 0.235         | 78         | 0.135        | 80.64      | 0.025        |
| 81         | 0.402         | 80.64      | 0.321         | 78.69      | 0.238         | 81.25      | 0.136        | 87.68      | 0.025        |
| 92.4       | 0.403         | 86.94      | 0.327         | 90.28      | 0.240         | 87.1       | 0.136        | 92.16      | 0.025        |
| 102        | 0.405         | 92.61      | 0.328         | 98.21      | 0.241         | 94.25      | 0.137        | 98.56      | 0.025        |
| 105.6      | 0.405         | 98.91      | 0.330         | 101.26     | 0.242         | 99.45      | 0.138        | 103.68     | 0.025        |
| 112.8      | 0.406         | 113.4      | 0.331         | 112.85     | 0.244         | 117.65     | 0.138        | 110.72     | 0.026        |
| 115.8      | 0.406         | 117.18     | 0.333         | 118.34     | 0.244         | 122.85     | 0.138        | 114.56     | 0.026        |
| 123.6      | 0.406         | 122.85     | 0.337         | 122        | 0.244         | 126.75     | 0.138        | 118.4      | 0.026        |
| 130.8      | 0.406         | 131.67     | 0.338         | 129.32     | 0.244         | 130.65     | 0.138        | 122.24     | 0.026        |
| 135        | 0.406         | 135        | 0.340         | --         | --            | 135.2      | 0.138        | 128        | 0.026        |

Table S. 5. Experimental solubility data for CO<sub>2</sub> in [BzHEA][Cl] at different pressures

| Time (min) | 20 bar $\chi$ | Time (min) | 15 bar $\chi$ | Time (min) | 10 bar $\chi$ | Time (min) | 5 bar $\chi$ | Time (min) | 1 bar $\chi$ |
|------------|---------------|------------|---------------|------------|---------------|------------|--------------|------------|--------------|
| 0          | 0             | 0          | 0             | 0          | 0             | 0          | 0            | 0          | 0            |
| 1.8        | 0.041         | 6          | 0.085         | 2.4        | 0.019         | 7.8        | 0.031        | 5.4        | 0.004        |
| 5.4        | 0.110         | 13         | 0.136         | 10.2       | 0.073         | 12.6       | 0.042        | 10.2       | 0.007        |
| 12.6       | 0.172         | 18         | 0.156         | 15.6       | 0.093         | 19.2       | 0.053        | 14.4       | 0.009        |
| 15         | 0.182         | 23         | 0.177         | 24         | 0.113         | 27         | 0.062        | 19.8       | 0.010        |
| 19.8       | 0.200         | 32         | 0.189         | 32.4       | 0.125         | 32.4       | 0.066        | 33         | 0.011        |
| 28.2       | 0.213         | 40.2       | 0.198         | 43.2       | 0.132         | 40.8       | 0.071        | 37.2       | 0.011        |
| 45.6       | 0.228         | 46.2       | 0.202         | 54.6       | 0.137         | 51.6       | 0.072        | 40.8       | 0.012        |
| 52.8       | 0.232         | 54         | 0.205         | 67.8       | 0.138         | 57.6       | 0.073        | 45         | 0.012        |
| 61.2       | 0.236         | 58.8       | 0.208         | 74.4       | 0.142         | 64.2       | 0.074        | 51.6       | 0.012        |
| 66.6       | 0.237         | 69.6       | 0.209         | 85.2       | 0.144         | 70.8       | 0.075        | 54         | 0.013        |
| 79.2       | 0.242         | 76.8       | 0.211         | 90         | 0.146         | 81         | 0.075        | 61.8       | 0.013        |
| 87         | 0.244         | 85.8       | 0.212         | 103.2      | 0.146         | 85.2       | 0.076        | 64.8       | 0.013        |
| 97.2       | 0.246         | 96.6       | 0.213         | 107.4      | 0.147         | 98.4       | 0.076        | 71.4       | 0.013        |
| 109.2      | 0.248         | 99.6       | 0.213         | 118.8      | 0.152         | 102.6      | 0.077        | 75         | 0.013        |
| 118.2      | 0.250         | 113.4      | 0.216         | 125.4      | 0.154         | 112.8      | 0.078        | 86.4       | 0.014        |
| 128.4      | 0.252         | 136.8      | 0.216         | 131.4      | 0.155         | 119.4      | 0.078        | 96.6       | 0.014        |
| 140.4      | 0.252         | 137.4      | 0.216         | 136.2      | 0.155         | 123.6      | 0.079        | 113.4      | 0.014        |
| 147.6      | 0.252         | 144        | 0.216         | 139.2      | 0.155         | 140.4      | 0.081        | 125.4      | 0.015        |
| 153        | 0.252         | 148.8      | 0.217         |            |               | 143.4      | 0.080        | 141.6      | 0.015        |

Table S.6. Experimental solubility data for CO<sub>2</sub> in [AyHEA][Cl] at different pressures

| Time (min) | 20 bar $\chi$ | Time (min) | 15 bar $\chi$ | Time (min) | 10 bar $\chi$ | Time (min) | 5 bar $\chi$ | Time (min) | 1 bar $\chi$ |
|------------|---------------|------------|---------------|------------|---------------|------------|--------------|------------|--------------|
| 0          | 0             | 0          | 0             | 0          | 0             | 0          | 0            | 0          | 0            |
| 1.8        | 0.027         | 4.2        | 0.054         | 2.4        | 0.013         | 3          | 0.004        | 9.6        | 0.004        |
| 3          | 0.050         | 10.2       | 0.095         | 9.6        | 0.054         | 6.6        | 0.009        | 14.4       | 0.005        |
| 6          | 0.086         | 12.6       | 0.107         | 12.6       | 0.069         | 10.8       | 0.015        | 17.4       | 0.006        |
| 10.2       | 0.119         | 16.2       | 0.123         | 17.4       | 0.083         | 14.4       | 0.020        | 27         | 0.007        |
| 12.6       | 0.139         | 21         | 0.138         | 22.8       | 0.095         | 18.6       | 0.025        | 40.2       | 0.007        |
| 21         | 0.170         | 25.2       | 0.149         | 30.6       | 0.107         | 25.8       | 0.034        | 44.4       | 0.007        |
| 31.2       | 0.192         | 30.6       | 0.161         | 37.8       | 0.113         | 31.2       | 0.042        | 48         | 0.007        |
| 35.4       | 0.200         | 38.4       | 0.169         | 48         | 0.118         | 34.2       | 0.045        | 52.2       | 0.008        |
| 47.4       | 0.206         | 43.8       | 0.173         | 58.8       | 0.122         | 39.6       | 0.051        | 58.8       | 0.008        |
| 60.6       | 0.213         | 48         | 0.176         | 63.6       | 0.122         | 45         | 0.054        | 61.2       | 0.008        |
| 67.2       | 0.217         | 54         | 0.180         | 71.4       | 0.125         | 49.2       | 0.056        | 69         | 0.008        |
| 81.6       | 0.222         | 61.2       | 0.183         | 81.6       | 0.127         | 57         | 0.060        | 72         | 0.008        |
| 94.8       | 0.227         | 83.4       | 0.187         | 91.2       | 0.130         | 61.2       | 0.061        | 78.6       | 0.008        |
| 112.8      | 0.231         | 99.6       | 0.188         | 96.6       | 0.130         | 73.8       | 0.064        | 82.2       | 0.008        |
| 125.4      | 0.232         | 106.2      | 0.188         | 105        | 0.131         | 85.2       | 0.065        | 87.6       | 0.009        |
| 128.4      | 0.233         | 115.2      | 0.188         | 116.4      | 0.135         | 112.2      | 0.069        | 103.8      | 0.009        |
| 135        | 0.235         | 130.2      | 0.189         | 122.4      | 0.136         | 121.8      | 0.069        | 120.6      | 0.010        |
| 141        | 0.237         | 138.6      | 0.190         | 130.2      | 0.138         | 126.6      | 0.070        | 123.6      | 0.010        |

Table S. 7. Experimental solubility data for CO<sub>2</sub> in [BzPy][Cl] at different pressures

| Time (min) | 20 bar $\chi$ | Time (min) | 15 bar $\chi$ | Time (min) | 10 bar $\chi$ | Time (min) | 5 bar $\chi$ | Time (min) | 1 bar $\chi$ |
|------------|---------------|------------|---------------|------------|---------------|------------|--------------|------------|--------------|
| 0          | 0             | 0          | 0             | 0          | 0             | 0          | 0            | 0          | 0            |
| 1.08       | 0.025         | 6          | 0.051         | 1.44       | 0.012         | 4.68       | 0.019        | 3.24       | 0.002        |
| 3.24       | 0.066         | 11         | 0.081         | 6.12       | 0.044         | 7.56       | 0.025        | 6.12       | 0.004        |
| 7.56       | 0.103         | 15         | 0.093         | 9.36       | 0.056         | 11.52      | 0.032        | 8.64       | 0.005        |
| 9.00       | 0.109         | 19         | 0.106         | 14.4       | 0.068         | 16.2       | 0.037        | 11.88      | 0.006        |
| 11.88      | 0.120         | 22         | 0.114         | 19.44      | 0.075         | 19.44      | 0.040        | 19.8       | 0.007        |
| 16.92      | 0.128         | 25         | 0.119         | 25.92      | 0.079         | 24.48      | 0.043        | 22.32      | 0.007        |
| 27.36      | 0.137         | 27.72      | 0.121         | 32.76      | 0.082         | 30.96      | 0.043        | 24.48      | 0.007        |
| 31.68      | 0.139         | 32.4       | 0.123         | 40.68      | 0.083         | 34.56      | 0.044        | 27         | 0.007        |
| 36.72      | 0.141         | 35.28      | 0.125         | 44.64      | 0.085         | 38.52      | 0.044        | 30.96      | 0.007        |
| 39.96      | 0.142         | 41.76      | 0.125         | 51.12      | 0.087         | 42.48      | 0.045        | 32.4       | 0.008        |
| 47.52      | 0.145         | 46.08      | 0.126         | 54         | 0.087         | 48.6       | 0.045        | 37.08      | 0.008        |
| 52.2       | 0.146         | 51.48      | 0.127         | 61.92      | 0.088         | 51.12      | 0.046        | 38.88      | 0.008        |
| 58.32      | 0.148         | 57.96      | 0.128         | 64.44      | 0.088         | 59.04      | 0.046        | 42.84      | 0.008        |
| 65.52      | 0.149         | 59.76      | 0.128         | 71.28      | 0.091         | 61.56      | 0.046        | 45         | 0.008        |
| 70.92      | 0.150         | 68.04      | 0.130         | 75.24      | 0.092         | 67.68      | 0.047        | 51.84      | 0.008        |
| 77.04      | 0.151         | 82.08      | 0.130         | 78.84      | 0.093         | 71.64      | 0.047        | 57.96      | 0.009        |
| 84.24      | 0.151         | 82.44      | 0.130         | 81.72      | 0.093         | 74.16      | 0.047        | 68.04      | 0.009        |
| 88.56      | 0.151         | 86.4       | 0.130         | 83.52      | 0.093         | 84.24      | 0.049        | 75.24      | 0.009        |
| 91.8       | 0.151         | 89.28      | 0.130         |            |               | 86.04      | 0.048        | 84.96      | 0.009        |

Table S. 8. Experimental solubility data for CO<sub>2</sub> in [AyPy][Cl] at different pressures

| Time (min) | 20 bar $\chi$ | Time (min) | 15 bar $\chi$ | Time (min) | 10 bar $\chi$ | Time (min) | 5 bar $\chi$ | Time (min) | 1 bar $\chi$ |
|------------|---------------|------------|---------------|------------|---------------|------------|--------------|------------|--------------|
| 0          | 0             | 0          | 0             | 0          | 0             | 0          | 0            | 0          | 0            |
| 1.08       | 0.016         | 4          | 0.032         | 1.44       | 0.008         | 1.8        | 0.002        | 5.76       | 0.002        |
| 1.8        | 0.030         | 8          | 0.057         | 5.76       | 0.032         | 3.96       | 0.005        | 8.64       | 0.003        |
| 3.6        | 0.051         | 9          | 0.064         | 7.56       | 0.041         | 6.48       | 0.009        | 10.44      | 0.004        |
| 6.12       | 0.071         | 11         | 0.074         | 10.44      | 0.050         | 8.64       | 0.012        | 16.2       | 0.004        |
| 7.56       | 0.083         | 14         | 0.083         | 13.68      | 0.057         | 11.16      | 0.015        | 24.12      | 0.004        |
| 12.6       | 0.102         | 17         | 0.089         | 18.36      | 0.064         | 15.48      | 0.020        | 26.64      | 0.004        |
| 18.72      | 0.115         | 20         | 0.097         | 22.68      | 0.068         | 18.72      | 0.025        | 28.8       | 0.004        |
| 21.24      | 0.120         | 23.04      | 0.102         | 28.8       | 0.071         | 20.52      | 0.027        | 31.32      | 0.005        |
| 28.44      | 0.123         | 26.28      | 0.104         | 35.28      | 0.073         | 23.76      | 0.031        | 35.28      | 0.005        |
| 36.36      | 0.128         | 28.8       | 0.106         | 38.16      | 0.073         | 27         | 0.033        | 36.72      | 0.005        |
| 40.32      | 0.130         | 32.4       | 0.108         | 42.84      | 0.075         | 29.52      | 0.033        | 41.4       | 0.005        |
| 48.96      | 0.133         | 36.72      | 0.110         | 48.96      | 0.076         | 34.2       | 0.036        | 43.2       | 0.005        |
| 56.88      | 0.136         | 50.04      | 0.112         | 54.72      | 0.078         | 36.72      | 0.037        | 47.16      | 0.005        |
| 67.68      | 0.138         | 59.76      | 0.113         | 57.96      | 0.078         | 44.28      | 0.038        | 49.32      | 0.005        |
| 75.24      | 0.139         | 63.72      | 0.113         | 63         | 0.079         | 51.12      | 0.039        | 52.56      | 0.005        |
| 77.04      | 0.140         | 69.12      | 0.113         | 69.84      | 0.081         | 67.32      | 0.041        | 62.28      | 0.005        |
| 81         | 0.141         | 78.12      | 0.113         | 73.44      | 0.082         | 73.08      | 0.041        | 72.36      | 0.006        |
| 84.6       | 0.142         | 83.16      | 0.114         | 78.12      | 0.083         | 75.96      | 0.042        | 47.16      | 0.006        |

Table S. 9. Experimental density values ( $\rho$ ) for the studied ILs at atmospheric pressure as a function of temperature ( $T$ ).

| $T/K$  | $\rho/(\text{g}\cdot\text{cm}^{-3})$ |           |           |           |             |             |
|--------|--------------------------------------|-----------|-----------|-----------|-------------|-------------|
|        | [HEA][Ac]                            | [HEA][Bu] | [HEA][La] | [HEA][As] | [AyHEA][Cl] | [BzHEA][Cl] |
| 298.15 | 1.18982                              | 1.12571   | 1.23011   | 1.05799   | 1.3001      | 1.3122      |
| 308.15 | 1.18312                              | 1.11832   | 1.22122   | 1.04989   | 1.2920      | 1.3028      |
| 318.15 | 1.17447                              | 1.11036   | 1.21425   | 1.04259   | 1.2825      | 1.2947      |
| 328.15 | 1.16551                              | 1.10276   | 1.20564   | 1.03383   | 1.2744      | 1.2852      |
| 338.15 | 1.15663                              | 1.09535   | 1.19676   | 1.02589   | 1.2650      | 1.2771      |
| 348.15 | 1.14976                              | 1.08749   | 1.18988   | 1.01777   | 1.2569      | 1.2690      |

Table S. 10. Experimental viscosity values ( $\eta$ ) for the studied ILs at atmospheric pressure as a function of temperature ( $T$ ).

| $T/K$  | $\eta/(\text{mPa}\cdot\text{s})$ |           |           |           |             |             |
|--------|----------------------------------|-----------|-----------|-----------|-------------|-------------|
|        | [HEA][Ac]                        | [HEA][Bu] | [HEA][La] | [HEA][As] | [AyHEA][Cl] | [BzHEA][Cl] |
| 298.15 | 470.44                           | 1427.18   | 858.29    | 2976.21   | 1205.40     | 1314.95     |
| 308.15 | 210.45                           | 586.88    | 381.46    | 1239.83   | 503.91      | 545.84      |
| 318.15 | 92.25                            | 291.31    | 169.54    | 553.89    | 248.11      | 271.03      |
| 328.15 | 40.99                            | 143.03    | 75.35     | 257.55    | 117.06      | 131.08      |
| 338.15 | 18.221                           | 63.57     | 33.49     | 114.469   | 47.81       | 55.10       |
| 348.15 | 8.098                            | 28.25     | 14.88     | 50.875    | 21.56       | 24.93       |

Table S. 11. First-order saturation model fitted parameters

| <b>IL</b>   | $q_e$  | <b>95% CI</b> | $k$    | <b>95% CI</b> |
|-------------|--------|---------------|--------|---------------|
| [HEA][As]   | 0.5719 | 0.5581–0.5856 | 0.0703 | 0.0612–0.0795 |
| [HEA][La]   | 0.5570 | 0.5346–0.5794 | 0.0542 | 0.0441–0.0642 |
| [HEA][Bu]   | 0.5403 | 0.5276–0.5530 | 0.0513 | 0.0468–0.0557 |
| [HEA][Ac]   | 0.4031 | 0.4002–0.4059 | 0.0726 | 0.0699–0.0753 |
| [BzHEA][Cl] | 0.2437 | 0.2392–0.2483 | 0.0933 | 0.0834–0.1032 |
| [AyHEA][Cl] | 0.2261 | 0.2210–0.2312 | 0.0699 | 0.0627–0.0771 |
| [BzPy][Cl]  | 0.1461 | 0.1434–0.1489 | 0.1556 | 0.1391–0.1722 |
| [AyPy][Cl]  | 0.1356 | 0.1325–0.1386 | 0.1158 | 0.1040–0.1277 |
